# Supplementary material for: Analysis of Concentrated COVID-19 Outbreaks in Elderly Facilities in Suita City, Osaka Prefecture, Japan
Source: MDPI journal article supplement (doi:10.3390/ijerph20206926), 2023-10-15
Supplement: s1 [file s1]

# Supplementary Materials:

Table S1: Time period of each COVID-19 wave in Osaka Prefecture, number of positive cases in Suita City, major epidemic strains in Osaka Prefecture, and number of outbreaks according to the type of nursing home with a capacity of 40 or more individuals in Suita City. 25 out of 31 outbreaks (80.6%) were found in sixth wave or seventh wave.

|              | From       | To         | The number of positive cases in Suita City | The major epidemic strains   | The number of outbreaks according to the type of nursing home in Suita City |                                     |                                                  |                                                 |                                          |       |
|--------------|------------|------------|--------------------------------------------|------------------------------|-----------------------------------------------------------------------------|-------------------------------------|--------------------------------------------------|-------------------------------------------------|------------------------------------------|-------|
|              |            |            |                                            |                              | Long-term care facility                                                     | Intensive care home for the elderly | Fee-based home for the elderly with nursing care | Residential type fee-based home for the elderly | Elderly housing with supportive services | Total |
| First Wave   | 2020/1/29  | 2020/6/13  | 62                                         | Wild-type                    | 0                                                                           | 0                                   | 0                                                | 0                                               | 0                                        | 0     |
| Second Wave  | 2020/6/14  | 2020/10/9  | 310                                        | Wild-type                    | 0                                                                           | 0                                   | 0                                                | 0                                               | 0                                        | 0     |
| Third Wave   | 2020/10/10 | 2021/2/28  | 1056                                       | Wild-type                    | 0                                                                           | 1                                   | 0                                                | 1                                               | 0                                        | 2     |
| Fourth Wave  | 2021/3/1   | 2021/6/20  | 1616                                       | Alpha variant                | 1                                                                           | 0                                   | 0                                                | 1                                               | 0                                        | 2     |
| Fifth Wave   | 2021/6/21  | 2021/12/16 | 3793                                       | Delta variant                | 0                                                                           | 1                                   | 1                                                | 0                                               | 0                                        | 2     |
| Sixth Wave   | 2021/12/17 | 2022/6/24  | 31,156                                     | Omicron variant BA.1 to BA.2 | 3                                                                           | 6                                   | 1                                                | 4                                               | 0                                        | 14    |
| Seventh Wave | 2022/6/25  | 2022/8/30  | 37,436                                     | Omicron variant BA.5         | 3                                                                           | 5                                   | 0                                                | 2                                               | 1                                        | 11    |

Positive Case Rate

Facility Capacity individuals

- Long-term care health facilities
- △ Intensive care homes for the elderly
- + Dementia care facilities
- ⊠ Fee-based homes for the elderly with nursing care
- ◇ Residential type fee-based homes for the elderly
- Elderly housing with supportive services
